## **Role of Mcpip1 in obesity-induced hepatic steatosis as determined by myeloid and liver-specific conditional knockouts.**

Natalia Pydyn<sup>1</sup>, Dariusz Żurawek<sup>1</sup>, Joanna Koziel<sup>2</sup>, Edyta Kuś<sup>3</sup>, Kamila Wojnar-Lason<sup>3</sup>, Agnieszka Jaształ<sup>3</sup>, Mingui Fu<sup>4</sup>, Jolanta Jura<sup>1</sup>, Jerzy Kotlinowski<sup>1,\*</sup>

<sup>1</sup> Department of General Biochemistry, Faculty of Biochemistry, Biophysics and Biotechnology, Jagiellonian University, Gronostajowa 7, 30-387 Krakow, Poland.

<sup>2</sup> Department of Microbiology, Faculty of Biochemistry, Biophysics and Biotechnology, Jagiellonian University, Gronostajowa 7, 30-387 Krakow, Poland.

<sup>3</sup> Jagiellonian Center for Experimental Therapeutics, Jagiellonian University, Bobrzynskiego 14, 30-348 Krakow, Poland.

<sup>4</sup> Department of Biomedical Science and Shock/Trauma Research Center, School of Medicine, University of Missouri, Kansas City, Missouri, USA.

\* corresponding author

Jerzy Kotlinowski

Address: Gronostajowa Street 7, 30-387 Krakow, Poland

Telephone: +48 12 6646139

Email: [j.kotlinowski@uj.edu.pl](mailto:j.kotlinowski@uj.edu.pl)

**Word count:** 2870 (Introduction, Results and Discussion)

**Number of figures:** 5

**Number of tables:** 1

**Abbreviations:**

ALT: alanine aminotransferase

AST: aspartate aminotransferase

BMI: body mass index

ECM: extracellular matrix

GTT: glucose tolerance test

HFD: high-fat diet

HDL: high-density lipoprotein

LDL: low-density lipoprotein

LDH: lactate dehydrogenase

NAFLD: non-alcoholic fatty liver disease

NASH: non-alcoholic steatohepatitis

**Conflict of interest statement:**

The authors have no conflict of interest to disclose.

**Financial support statement:**

This work was supported by research grant from National Science Centre, Poland no. 2015/19/D/NZ5/00254 to JeKo.

**Ethics approval statement:**

All experiments were approved by the Local Animal Ethics Commission.

**Author's contribution:**

**Natalia Pydyn:** Conceptualization, Methodology, Investigation, Writing – Original Draft, Visualization;  
**Dariusz Żurawek:** Investigation, Writing – Review & Editing; **Joanna Koziel:** Resources, Writing – Review & Editing; **Edyta Kuś:** Investigation, Writing – Review & Editing; **Kamila Wojnar-Lasoń:** Investigation; **Agnieszka Jaształ:** Investigation; **Mingui Fu:** Resources; **Jolanta Jura:** Conceptualization, Writing – Review & Editing; **Jerzy Kotlinowski:** Conceptualization, Methodology, Writing – Original Draft, Supervision, Project administration, Funding acquisition.

Supporting source had no involvement in the study design.

## Abstract

**Background&Aims:** Monocyte chemoattractant protein-induced protein 1 (MCPIP1, *alias* Regnase1) is a negative regulator of inflammation, acting through cleavage of transcripts coding for proinflammatory cytokines and by inhibition of NFκB activity. Moreover, it was demonstrated, that MCPIP1 regulates lipid metabolism both in adipose tissue and hepatocytes. In this study, we investigated the effects of tissue-specific *Mcpip1* deletion on the regulation of hepatic metabolism and development of non-alcoholic fatty liver disease (NAFLD).

**Methods:** We used mice with deletion of *Mcpip1* in myeloid leukocytes (*Mcpip1*<sup>LysM<sup>KO</sup>) and in hepatocytes (*Mcpip1*<sup>Alb<sup>KO</sup>), which were fed chow or a high-fat diet (HFD) for 12 weeks.</sup></sup>

**Results:** *Mcpip1*<sup>LysM<sup>KO</sup> mice which were fed a chow diet were characterized by a significantly reduced hepatic expression of genes regulating lipid and glucose metabolism, which was followed by hypoglycemia and dyslipidemia. These animals also developed systemic inflammation, manifested by increased concentrations of cytokines in the plasma. On the other hand, there were no significant changes in phenotype in *Mcpip1*<sup>Alb<sup>KO</sup> mice. Although we detected a reduced hepatic expression of genes regulating glucose metabolism and β-oxidation in these mice, they remained asymptomatic. Upon feeding them a HFD, *Mcpip1*<sup>LysM<sup>KO</sup> mice did not develop obesity, glucose intolerance, nor hepatic steatosis, but were characterized by hypoglycemia and dyslipidemia, along with proinflammatory phenotype with symptoms of cachexia. *Mcpip1*<sup>Alb<sup>KO</sup> animals, following a HFD, became hypercholesterolemic, but accumulated lipids in the liver at the same level as *Mcpip1*<sup>fl/fl</sup> mice, and had no changes in the level of soluble factors tested in the plasma.</sup></sup></sup></sup>

**Conclusions:** In conclusion, we have demonstrated that *Mcpip1* protein plays an important role in the development of fatty liver disease, hepatitis, and during NAFLD progression. Depletion of *Mcpip1* in myeloid leukocytes, followed by systemic inflammation, has a more pronounced effect on controlling liver metabolism and homeostasis than the depletion of *Mcpip1* in hepatocytes.

**Keywords:** MCPIP1, fatty liver, NAFLD, obesity, inflammation

## Introduction

Monocyte chemoattractant protein-induced protein 1 (MCPIP1, alias Regnase1), encoded by the *ZC3H12A* gene, is a RNase that degrades mRNAs, pre-miRNAs, and viral RNAs [1]. MCPIP1, by direct cleaving of transcripts coding for proinflammatory cytokines like IL-1 $\beta$ , IL-6, IL-8 and IL-12 [2, 3, 4, 5], and by indirect inhibition of NF $\kappa$ B activity [6], functions as a negative regulator of inflammation. Apart from immunomodulatory effects, MCPIP1 activity was shown to regulate many biological processes, such as cell differentiation, angiogenesis, proliferation, and adipogenesis [7, 8, 9]. Adipogenesis of 3T3-L1 cells is inhibited *via* the degradation of C/EBP $\beta$  and selected pre-miRNAs by MCPIP1 [9, 10]. Additionally, the MCPIP1 level in human adipose tissue inversely correlates with patients' BMI, and is reduced in livers from NAFLD subjects [11, Pydyn in preparation]. Similarly to humans, the protein level of Mccip1 is reduced in hepatocytes and in subcutaneous adipose tissue of mice with NAFLD, in comparison to control animals [12]. Despite the results mentioned above, the functions of Mccip1 in liver metabolism and NAFLD progression remain obscure.

Previous studies have shown that *Zc3h12a*-deficient mice spontaneously develop systemic inflammatory response, leading to splenomegaly, lymphadenopathy, hyperimmunoglobulinemia, and ultimately death within 12 weeks [3, 13]. Similarly, a hematopoietic deficiency of Mccip1 resulted in severe systemic and multi-organ inflammation [14]. It was also shown that overexpression of Mccip1 reduces liver injury in septic mice, by inhibiting inflammatory reaction in macrophages [15]. Additionally, Mccip1 ameliorates liver damage, reduces inflammation, and promotes tissue regeneration in the hepatic ischemia/reperfusion injury model [16].

NAFLD describes a wide range of liver conditions affecting people who drink little to no alcohol. It is a chronic and progressive disease, characterized in the first stages by an excessive accumulation of triglycerides in hepatocytes [17]. Untreated NAFLD can progress from simple steatosis, to more severe non-alcoholic steatohepatitis (NASH), which is additionally characterized by liver inflammation and

fibrosis [18]. Ultimately, NASH can further progress to cirrhosis and/or hepatocellular carcinoma, which over time might require liver transplantation [19].

In our study, we aimed to examine the contribution of *Mcpip1* to hepatic metabolism control and the pathogenesis of NAFLD. Specifically, we used Cre-LoxP technology to deactivate *Zc3h12a* encoding *Mcpip1* in liver tissue. We used mice with *Mcpip1* depleted in myeloid leukocytes (*Mcpip1*<sup>LysM<sup>KO</sup>) and in hepatocytes (liver knockout, *Mcpip1*<sup>Alb<sup>KO</sup>). By comparing these two animal models, we were able to analyze the tissue-specific effects of *Mcpip1* on liver metabolism and NAFLD development. Our results provide comprehensive data on the role of the *Mcpip1* expression in the myeloid leukocytes and liver cells in the regulation of metabolism and sterile inflammation.</sup></sup>

## Materials and Methods

### *Animals, diets, and genotyping*

Ten-week-old male C57BL/6 mice (Charles River Laboratories) were fed *ad libitum* for 12 weeks with a control diet (AIN) or HFD, 60% kcal from fat (ZooLab), starting from the age of 10 weeks. Animals were housed under SPF conditions in ventilated cages in a temperature-controlled environment with a 14/10 h light/dark cycle. To measure the amount of consumed fodder, the mice were housed in metabolic cages. To obtain myeloid or hepatocyte-specific knockout of *Zc3h12a* gene encoding *Mcpip1*, we used *Mcpip1*<sup>fl/fl</sup> mice, with two loxp sites flanking the two sides of exon 3 of the *Zc3h12a* gene, kindly provided by dr Mingui Fu [20]. Next, these mice were crossed with myeloid cell- (*LysM*<sup>Cre</sup>, Jackson Laboratory) or liver cell-specific Cre-expressing transgenic mice (*Alb*<sup>Cre</sup>, Jackson Laboratory). The resultant mice were designated respectively as *Mcpip1*<sup>LysM<sup>KO</sup> and *Mcpip1*<sup>Alb<sup>KO</sup>. For genotyping, DNA was extracted from tail tissue with a KAPA Mouse Genotyping Kit (KAPA Biosystems) according to the manufacturer's instructions. Genotyping for loxp insertion was performed by PCR using the following primers: GCCTTCCTGATCCTATTGGAG (loxp/wild-type), GAGATGGCGCAGCGCAATTAAT (loxp/mutant) and GCCTCTTGTCACCTCCCTCCTCC (loxp/common). Genotyping for *LysM*<sup>Cre</sup> included the following primers: TTACAGTCGGCCAGGCTGAC (*LysM*/wild-type), CCCAGAAATGCCAGATTACG</sup></sup>

(LysM/mutant) and CTTGGGCTGCCAGAATTTCTC (LysM/common). Genotyping for Alb<sup>Cre</sup> included the following primers: TGCAAACATCACATGCACAC (Alb/wild-type), GAAGCAGAAGCTTAGGAAGATGG (Alb/mutant) and TTGGCCCCTTACCATAACTG (Alb/common). All experiments were approved by the Local Animal Ethics Commission.

#### *Blood and tissue samples*

The mice were fasted for 4 h, after which their blood was collected from the orbital sinus after isoflurane anesthesia into EDTA containing tubes, and then the animals were put down. Plasma was prepared by centrifugation (1000g, 10 min) and stored at  $-80^{\circ}\text{C}$ . Following euthanasia by cervical dislocation, organs were removed and prepared for histological analysis, or snap-frozen in liquid nitrogen and stored at  $-80^{\circ}\text{C}$ .

#### *Plasma analysis*

Murine plasma was used for the subsequent analysis: total cholesterol, HDL-cholesterol (HDL), LDL-cholesterol (LDL), glucose, triglycerides, alanine aminotransferase (ALT), aspartate aminotransferase (AST), and lactate dehydrogenase (LDH). These parameters were measured using an automatic biochemical analyzer, Pentra 400 (Horiba), by an enzymatic photometric method according to the vendor's instructions.

#### *Glucose tolerance test*

A glucose tolerance test (GTT) was performed on mice aged 10 and 22 weeks. Mice were fasted for 4 hours, after which they were intraperitoneally injected with saturated glucose solution (2 g/kg body weight). Blood was collected from the tail vein before (0 min) and at 15, 30, 45, 60, and 120 min after glucose application. Glucose concentrations were measured by an Accu-Check glucometer (Roche Diagnostics). The area under the curve (AUC) of blood glucose concentration was calculated geometrically by applying a trapezoidal method [21].

### *Histological analysis*

Livers were fixed in 4% buffered formalin. One fragment was submerged in a 30% sucrose solution overnight for cryoprotection, and then frozen in Tissue-Tek® OCT medium at  $-80^{\circ}\text{C}$ . Frozen sections were stained using an Oil Red-O (ORO) method for fat accumulation, and photographed under 100 x magnification. The second fragment was processed using standard paraffin procedures, and 5- $\mu\text{m}$  paraffin tissue sections were stained with Hematoxylin and Eosin (H&E). 10 images of each section were randomly obtained and then analyzed by the Columbus Image Data Storage and Analysis System (Perkin Elmer) with an algorithm adapted for Oil Red-O stained sections.

### *Luminex assay*

Magnetic Luminex Assay (R&D Systems) was performed on plasma samples, according to the manufacturer's instructions. All samples were analyzed in duplicate on a MAGPIXs (Luminex, Texas, USA). Median fluorescence intensity (MFI) data, obtained using a weighted 5- parameter logistic curve-fitting method, was used to calculate analyte concentrations.

### *RNA isolation and RT-PCR*

Fenozol (A&A Biotechnology) was used for the isolation of total RNA from liver tissue. The concentration of RNA was assessed by a NanoDrop 1000 Spectrophotometer (Thermo Fisher Scientific). Reverse transcription was performed using 1  $\mu\text{g}$  of total RNA, oligo(dT) 15primer (Promega) and M-MLV reverse transcriptase (Promega). Real-time PCR was carried out using Sybr Green Master Mix (A&A Biotechnology) and QuantStudio Real-Time PCR System (Applied Biosystems). Gene expression was normalized to elongation factor-2 (EF2), after which the relative level of transcripts was quantified by a  $2^{-\Delta\Delta\text{Ct}}$  method. Sequences of primers (Genomed/Sigma) and annealing temperatures are listed in Table S1 in Supplementary Material.



### *Measurement of body temperature*

Mice body temperature was measured by rectal probing (physiological monitoring unit THM150, Visualsonics). The probe was inserted for 2 cm into the rectum and held in position for 10 seconds before temperature was determined. Measurements were conducted for five days at exactly the same time of day.

### *Open field test*

All mice were handled for three consecutive days prior to the start of behavioral measurements. On the day of the behavioral experiment, the mice were brought in their home cages to the testing room and left for one hour to acclimate. General locomotor activity and movement velocity were monitored in an open field in arena cages (40 x 40 x 38 cm) made from transparent plexiglass, equipped with an array of infrared photo beams and software for automatic tracking of mouse ambulation (Activity Monitor 7, Med Associates inc. St. Albans, VT, USA). The open field arena was illuminated with white light at a level of 150 lux. The duration of each behavioral session was 30 min for each animal. After each trial, the cages were wiped with 70% ethanol and left to dry. To eliminate the effect of circadian rhythm on locomotor activity, all mice were subjected to the open field test between 6 and 9 pm.

### *Statistical analysis*

Results are expressed as mean  $\pm$  SEM. The exact number of experiments or animals used is indicated in the figure legends. One-way ANOVA with Tukey posttest way applied for comparison of multiple groups. To analyze the effects of two variable factors, a two-way ANOVA was used. The p values are marked with an asterisks in the charts (\* p<0.05; \*\* p<0.01; \*\*\* p<0.001).

All authors had access to the study data and had reviewed and approved the final manuscript.

## **Results**

### *Deletion of *Mcpip1* in myeloid cells, but not in hepatocytes, results in dyslipidemia*

Starting from the 7<sup>th</sup> week of the experiment, *Mcpip1*<sup>LysMKO</sup> mice were characterized by reduced mass, although they consumed an equal amount of food to *Mcpip1*<sup>fl/fl</sup> (Fig. 1A,B, S1A). At the age of 22 weeks, *Mcpip1*<sup>LysMKO</sup> exhibited significantly lower cholesterol, HDL, and glucose levels with concomitant increased concentration of LDL, when compared to control *Mcpip1*<sup>fl/fl</sup> mice (Fig. 1C-E,J,K). We did not observe differences in the concentration of triglycerides, nor activity of ALT, AST and LDH in *Mcpip1*<sup>LysMKO</sup> animals (Fig. 1F-I). Additionally, all measured analytes did not differ between control and *Mcpip1*<sup>AlbKO</sup> mice (Fig. 1C-K).

#### *Myeloid and hepatic Mcpip1 deletion alters expression of genes regulating glucose metabolism*

In order to identify the molecular mechanism responsible for the development of hypoglycemia and dyslipidemia in *Mcpip1*<sup>LysMKO</sup> animals, we analyzed a hepatic gene expression. The analysis revealed that *Mcpip1*<sup>LysKO</sup> exhibit a significantly reduced expression of *G6pc* (regulating gluconeogenesis), *Irs1*, *Irs2* (response to insulin) and *Slc2a2* (glucose bidirectional transport) in livers (Fig. 2A). Changes in the livers of *Mcpip1*<sup>AlbKO</sup> mice were not as significant as in the case of *Mcpip1*<sup>LysKO</sup>, and included a lower expression of *Pck1*, *G6pc* and *Irs1* in comparison to *Mcpip1*<sup>fl/fl</sup> mice (Fig. 2A).

#### *Mcpip1 depletion disturbs lipid metabolism in the livers of Mcpip1<sup>LysMKO</sup> and Mcpip1<sup>AlbKO</sup> mice*

Besides regulating glucose metabolism, the liver is also a prominent regulator of lipid metabolism, due to the ability to perform lipoprotein synthesis and lipid storage [22]. That is why, in the following set of experiments, we have evaluated the expression of key genes related to lipid transport, lipogenesis, and fatty acids oxidation. As shown in Figure 2B-D, more significant changes in hepatic lipid metabolism were detected in *Mcpip1*<sup>LysMKO</sup> than in *Mcpip1*<sup>AlbKO</sup> mice (Fig. 2B-D). The expression of *Cd36* was increased, and *Mttp* was downregulated in the livers of *Mcpip1*<sup>LysMKO</sup> mice (Fig. 2B). Furthermore, the expression of *Ppara* was reduced in the hepatic tissue of *Mcpip1*<sup>LysMKO</sup> mice, together with its downstream targets *Acox1* and *Cpt1a*, but not *Acadl* (Fig. 2C). Among the three master regulators of lipogenesis (*Srebf1*, *Cebpb*, *Pparg*) [23, 24], we detected a lower expression of *Srebf1* in samples from *Mcpip1*<sup>LysMKO</sup> mice, together

with the downregulation of SREBP1c-regulated genes, *Acc1*, *Fasn* and *Scd1* (Fig. 2D). In livers isolated from *Mcpip1*<sup>AlbKO</sup> animals, there were no differences in the expression of genes regulating lipid transport (*Cd36*, *Fabp1*, *Mttp*), but the amount of *Acox1*, *Cpt1a* and *Scd1* transcripts was significantly reduced in comparison to control *Mcpip1*<sup>fl/fl</sup> mice (Fig. 2B-D).

#### *Deletion of Mcpip1 in myeloid cells, but not in hepatocytes, induces systemic inflammation*

To further characterize the phenotype of both *Mcpip1* knockout strains, we performed a Luminex Assay. Out of 45 analytes, 14 were not detected in all samples, whereas an expression of 20 was significantly changed between *Mcpip1*<sup>LysMKO</sup> and control mice (Table 1). The level of cytokines and its receptors (Tnf-alpha, Il-6 R alpha, Tnf RI, Tnf RII) was significantly upregulated in *Mcpip1*<sup>LysMKO</sup> in comparison to *Mcpip1*<sup>fl/fl</sup> mice. Cytokines that are chemotactic among other monocytes (*Ccl8/Mcp2*, *Ccl7/Marc*, *Ccl3/Mip-1 alpha*) dendritic cells, T and B cells (*Ccl19/Mip-3 beta*) lymphocytes, and eosinophils (*Ccl12/Mcp-5*), were significantly induced in *Mcpip1*<sup>LysMKO</sup> animals. Concentrations of other inflammation markers, such as Syndecan-1/CD138, Chi3-L1, and p-Selectin, were also increased in *Mcpip1*<sup>LysMKO</sup> animals compared to control mice (Table 1). In myeloid *Mcpip1* knockouts, we detected a reduced amount of three proteins, namely Vegf-R2, Thrombospondin 4, and endoglin. Surprisingly, concentrations of all tested analytes were not changed between *Mcpip1*<sup>fl/fl</sup> and *Mcpip1*<sup>AlbKO</sup> mice, indicating a key immunomodulatory role of myeloid *Mcpip1*.

Systemic inflammation in *Mcpip1*<sup>LysKO</sup> mice was followed by a proinflammatory hepatic gene expression pattern. Expression of *Il6*, *Il1b*, as well as *Tnfa* and *Cd68* was significantly upregulated in the livers of *Mcpip1*<sup>LysMKO</sup> in comparison to *Mcpip1*<sup>fl/fl</sup> mice. However, there were no changes between *Mcpip1*<sup>fl/fl</sup> and *Mcpip1*<sup>AlbKO</sup> samples (Fig. 2E). Inflammation and disturbed hepatic lipid metabolism can be accompanied by the development of fibrosis [25]. Indeed, we have found a significantly increased expression of profibrotic genes – *Tgfb*, *Mmp3* and *Mmp9* – in the livers of *Mcpip1*<sup>LysMKO</sup>. On the other hand, *Mcpip1*<sup>AlbKO</sup> mice were characterized by slightly, but not significantly higher expression of these selected genes (Fig. 2F).

*HFD does not induce obesity and hepatic steatosis in Mcpip1<sup>LysMKO</sup> mice*

In agreement with literature data, HFD feeding increased body mass and liver steatosis of Mcpip1<sup>fl/fl</sup> mice (Fig. 3A-C). However, starting from the third week of experiment, Mcpip1<sup>LysMKO</sup> mice were characterized by significantly decreased body weight, that cannot be fully attributed to lower food consumption (Fig. 3A, S1B). Additionally, Mcpip1<sup>LysMKO</sup> mice, after 12 weeks of HFD, were characterized by very limited liver steatosis (3% vs 37% in Mcpip1<sup>fl/fl</sup>) (Fig. 3B,C). On the other hand, the depletion of Mcpip1 in Mcpip1<sup>AlbKO</sup> mice did not cause any changes in body mass nor steatosis (Fig. 3A-C). Changes in lipid profile measured in plasma of both Mcpip1 knockouts, after 12 weeks of HFD, resembled results obtained in mice fed chow food: we detected low cholesterol and HDL concentration only in Mcpip1<sup>LysMKO</sup> mice (Fig. 3D,E). 12 weeks of HFD increased the LDL level in Mcpip1<sup>fl/fl</sup> in comparison to chow diet, blunting differences between these mice and myeloid knockouts (Fig. 3F). There were no changes in the LDL, triglycerides, ALT and AST in Mcpip1<sup>LysMKO</sup> when compared to Mcpip1<sup>fl/fl</sup> mice (Fig. 3F-I). Only the LDH level was raised in the plasma of Mcpip1<sup>LysMKO</sup> mice (Fig. 3J). Mcpip1<sup>AlbKO</sup> mice were characterized by increased cholesterol level, but all other analytes did not differ between these animals and Mcpip1<sup>fl/fl</sup> (Fig. 3D-J). Finally, feeding with HFD led to hyperglycemia and an impaired glucose tolerance detected in all three strains in comparison to mice fed a chow diet (Fig. 3K,L). However, even when fed HFD, Mcpip1<sup>LysMKO</sup> animals were characterized by hypoglycemia, in comparison to Mcpip1<sup>fl/fl</sup> counterparts (Fig. 3K,L).

The profile of cytokines, chemokines, and growth factors in the plasma of HFD-fed mice showed similar tendencies to animals fed chow food (Table S2). Concentrations of proinflammatory mediators (interleukins, chemokines, soluble receptors, and ECM proteins) were significantly increased in Mcpip1<sup>LysMKO</sup> mice compared to their Mcpip1<sup>fl/fl</sup> counterparts (Table S2). Again, there were no differences between Mcpip1<sup>AlbKO</sup> and Mcpip1<sup>fl/fl</sup> mice. Interestingly, HFD feeding of Mcpip1<sup>LysMKO</sup> mice further elevated the amount of MIP-1alpha, syndecan-1, and CHI3-L1, in comparison to animals on chow food (Table 1, S2).

### *Mcpip1 deficiency changes hepatic mRNA expression profile in HFD-fed mice*

The expression of key gluconeogenesis regulators (*Pck1*, *G6pc*) was not changed in myeloid knockouts, but impaired glucose metabolism in these mice, at least partially explained by a low level of *Irs1* and *Slc2a2* (Fig. 4A). Lipid metabolism was also altered in *Mcpip1*<sup>LysMKO</sup> animals fed for 12 weeks with HFD, as manifested by the reduced expression of *Fabp1* and *Mttp* regulating lipid transport, and low levels of *Ppara*, *Acox1* and *Cpt1a* mRNAs, that are involved in beta-oxidation (Fig. 4B-C). Additionally, the expression of genes regulating lipogenesis (*Srebf1*, *Acc1*, *Fasn* and *Scd1*) was significantly reduced in *Mcpip1*<sup>LysMKO</sup> mice (Fig. 4D). Additionally, there was a significant increase of proinflammatory and profibrotic transcripts in *Mcpip1*<sup>LysMKO</sup> mice in comparison to their *Mcpip1*<sup>fl/fl</sup> counterparts (Fig. 4E,F).

HFD feeding for 12 weeks blunted differences between *Mcpip1*<sup>AlbKO</sup> and *Mcpip1*<sup>fl/fl</sup> mice. Out of 26 tested genes, only the level of *Pck1* was decreased, and *Tgfb* was increased in *Mcpip1*<sup>AlbKO</sup> mice in comparison to controls (Fig. 4A,F). Overall changes in the hepatic gene expression pattern in HFD-fed mice – *Mcpip1*<sup>LysMKO</sup> and *Mcpip1*<sup>AlbKO</sup> knockouts vs. *Mcpip1*<sup>fl/fl</sup> were very similar to mice fed chow food (Fig. 2A-F, 4A-F). Thus, our results indicate that the deletion of *Mcpip1* protein in myeloid leukocytes has a more severe impact on metabolic regulatory function than hepatic *Mcpip1* deficiency. Additionally, *Mcpip1* acts independently from HFD-induced obesity effects on liver metabolic regulation.

### *Myeloid Mcpip1 deletion impairs locomotor activity and causes hypothermia*

Finally, it is well known that reduced locomotor activity is a major contributor to diet-induced obesity in mice (PMID: 18029443). That is why, in the last set of experiments, we investigated both average velocity and total traveled distance by 10 and 22-week-old *Mcpip1*<sup>LysMKO</sup> and *Mcpip1*<sup>AlbKO</sup> knockouts. Locomotor activity of all strains at 10 weeks was the same (Fig. 5A-B). However, 22-week-old *Mcpip1*<sup>LysMKO</sup> mice were characterized by significantly reduced locomotor activity. Although the average velocity of *Mcpip1*<sup>LysMKO</sup> was not changed, their total traveled distance was reduced by 70% in comparison to *Mcpip1*<sup>fl/fl</sup> mice (Fig. 5A-B). These mice weighed on average 7 grams less than *Mcpip1*<sup>fl/fl</sup> and

Mcpip1<sup>AlbKO</sup> mice, and were also characterized by hypothermia (35.5°C vs 37.6°C in controls) (Fig. 5C-D). In contrast, locomotor activity, weight and temperature in 22-week-old Mcpip1<sup>AlbKO</sup> mice were not affected by Mcpip1 deletion (Fig. 5A-D).

## Discussion

NAFLD describes liver conditions affecting people who drink little to no alcohol. NAFLD starts from relatively trouble-free non-alcoholic fatty liver (NAFL), and may progress to NASH, characterized by both fatty liver and hepatitis. NAFL and NASH are chronic diseases, thus without proper treatment they may progress to life-threatening complications such as cirrhosis, liver cancer, or liver failure. In 2014, NASH was the third most common indication for liver transplantation among American patients [26]. NAFLD can affect both lean and obese individuals, however, the risk of NAFL/NASH increased linearly with BMI [27]. According to the World Health Organization, in 2016, more than 1.9 billion adults were overweight (BMI  $\geq$  25-29.9 kg/m<sup>2</sup>), and of these, over 650 million were obese (BMI  $\geq$  30 kg/m<sup>2</sup>) [28]. Thus, to mimic human NAFLD etiology and progression, we used a high-fat, diet-induced obesity model.

We previously demonstrated that hepatic steatosis accompanying diet-induced obesity diminishes the amount of Mcpip1 protein in murine primary hepatocytes [12]. Similarly, the Mcpip1 protein level was reduced in murine and human adipose tissue collected from obese individuals [11, 12]. Additionally, Mcpip1 was shown to regulate lipid and glucose metabolism in hepatic and adipose tissue. Mechanistically, in hepatocytes Mcpip1 induces both the expression and activity of hepatic peroxisome proliferator-activated receptor gamma *via* the TXNIP/PGC-1 $\alpha$  pathway [12]. On the other hand, in 3T3-L1, preadipocytes differentiated into adipocytes, and endogenous MCPIP1 is downregulated at early stages of differentiation, allowing fat accumulation by preadipocytes. Additionally, an overexpression of MCPIP1 in 3T3-L1 cells impaired adipogenesis by direct cleavage of C/EBP $\beta$  mRNA and selected pre-miRNAs [9, 10].

Surprisingly, in the present study we demonstrated a lack of metabolic manifestation in Mcpip1<sup>AlbKO</sup> mice, despite the deletion of Mcpip1 in hepatocytes. Although Mcpip1 knockout in

hepatocytes reduces the expression of genes involved in glucose metabolism (*Pck1*, *G6pc*, *Irs1*), its concentration in the plasma was not changed when compared to *Mcpip1<sup>fl/fl</sup>* counterparts. Similarly, the lack of *Mcpip1* in hepatocytes did not influence lipid metabolism in mice fed chow or HFD. Of note, our observations are in accordance with another study, where we demonstrated that the deletion of *Mcpip1* in *Mcpip1<sup>AlbKO</sup>* mice is asymptomatic in terms of blood morphology and inflammation markers detected in plasma, but leads to the development of primary biliary cholangitis [Kotlinowski, submitted]. Recently, all *Mcpip1* knockout mice were characterized by diminished hepatic triglyceride content [29]. However, as demonstrated here, this phenotype cannot be attributed solely to *Mcpip1* depletion in hepatocytes, since dyslipidemia was detected only in *Mcpip1<sup>LysKO</sup>*, but not in *Mcpip1<sup>AlbKO</sup>* mice. What is more, the depletion of *Mcpip1* in myeloid leukocytes led not only to dyslipidemia, but also to systemic proinflammatory phenotype resembling cachexia symptoms.

Apart from fat accumulation in hepatocytes, a chronic local inflammation of low intensity is a characteristic feature of NAFLD. Besides positive effects resulting from inflammation, such as pathogen elimination and the restoration of homeostasis, unresolved or untamed inflammatory processes can lead to pathological changes, such as host tissue damage. For example, the infiltration of neutrophils and macrophages into the liver parenchyma is a hallmark of steatohepatitis. Thus, hepatic inflammation is a common trigger of liver diseases, responsible for the progression from fatty liver disease to severe fibrosis, steatohepatitis, and, finally, hepatocellular carcinoma [30]. Additionally, it is known that hepatitis leads to hepatic stellate cells activation and extracellular matrix deposition, which results in liver fibrosis [25]. Accordingly, we have observed an increased expression of profibrotic *Tgfb*, as well as metalloproteinases-coding genes, *Mmp3* and *Mmp9*, in the livers of *Mcpip1<sup>LysMKO</sup>* mice.

Recently, Li et.al reported that *Mcpip1<sup>LysMKO</sup>* mice develop inflammatory syndrome and cachexia at 5 months of age [20]. Cachexia is defined as a wasting syndrome, with the most prominent symptom being loss of weight, which can result from asthenia, systemic metabolic dysfunction, increased energy expenditure, or immune system impairment [31, 32]. Additionally, an elevated level of proinflammatory cytokines in the blood can be associated with weight loss [31, 33]. In accordance with these data,

*Mcpip1*<sup>LysMKO</sup> mice were characterized by weight loss (13% from initial body weight), which was accompanied by hypothermia, decreased locomotor activity, and hypoglycemia. Hypoglycemia of *Mcpip1*<sup>LysMKO</sup> mice might be explained by the altered expression of genes encoding proteins involved in gluconeogenesis (*G6pc*), insulin response (*Irs1*, *Irs2*), and glucose bidirectional transport (*Slc2a2*). Additionally, a raised level of *Tnf $\alpha$*  in plasma of these mice could account for decreased gluconeogenesis rates [34]. An increased level of LDL detected in *Mcpip1*<sup>LysMKO</sup> mice might result from concomitant reduction in HDL concentration, due to the fact that LDL maturation requires the acquirement of cholesterol esters from HDL particles. If this process is disturbed, low-density, cholesterol-poor LDL particles lose their affinity to LDL receptors, and remain in circulation [35].

Finally, *Mcpip1*<sup>LysMKO</sup> mice did not develop hepatic steatosis, despite being fed a HFD. This is surprising, because it was reported earlier that cachectic patients and mice spontaneously develop hepatic steatosis [36]. Steatosis present in cachectic patients and animal models was caused, among others, by an enhanced free fatty acids uptake by hepatocytes, reduced  $\beta$ -oxidation, or by a high concentration of proinflammatory cytokines (e. g. *Tnfa*) in the plasma – all features present in *Mcpip1*<sup>LysMKO</sup> mice [37-40]. However, as stated by Kliewer et.al, hepatic lipid metabolism may depend on the stage of cachexia, with no steatosis in early cachexia [41]. Cachexia in mice might be divided into an early or late stage, based on the difference in body weight between cachectic and control mice. As proposed by Sun and coworkers, this value was 18% for early and 29% for late cachexia [42]. In the case of *Mcpip1*<sup>LysMKO</sup> mice, we observed a 21% difference in body weight between *Mcpip1* <sup>$\Delta/\Delta$</sup>  and *Mcpip1*<sup>LysMKO</sup> that might suggest an early stage of cachexia, further supported by the lack of liver steatosis.

In conclusion, we have demonstrated that *Mcpip1* protein play an important role in the development of fatty liver disease, hepatitis, and NAFLD progression. The depletion of *Mcpip1* in myeloid leukocytes results in dyslipidemia, hypoglycemia, disturbed liver lipid metabolism, and systemic inflammation. On the other hand, *Mcpip1*<sup>AlbKO</sup> mice did not exhibit signs of systemic inflammation or disturbed glucose and lipid metabolism. Thus, *Mcpip1* expressed in myeloid leukocytes, but not in hepatocytes, plays a key role in the regulation of liver metabolism.



## References:

1. Miekus K, Kotlinowski J, Lichawska-Cieslar A, Rys J, Jura J. Activity of MCPIP1 RNase in tumor associated processes. *J Exp Clin Cancer Res* 2019; 38(1):421.
2. Mizgalska D, Wegrzyn P, Murzyn K, Kasza A, Koj A, Jura J, Jarzab B, Jura J. Interleukin-1-inducible MCPIP protein has structural and functional properties of RNase and participates in degradation of IL-1b mRNA. *FEBS* 2009; J276:7386–7399.
3. Matsushita K, Takeuchi O, Standley DM, Kumagai Y, Kawagoe T, Miyake T, Satoh T, Kato H, Tsujimura T, Nakamura H, Akira S. Zc3h12a is an RNase essential for controlling immune responses by regulating mRNA decay. *Nature* 2009; 458:1185–1190.
4. Dobosz E, Wilamowski M, Lech M, Bugara B, Jura J, Potempa J, Koziel J. MCPIP-1, Alias Regnase-1, Controls Epithelial Inflammation by Posttranscriptional Regulation of IL-8 Production. *J Innate Immun* 2016; 8(6):564-578.
5. Li M, Cao W, Liu H, Zhang W, Liu X, Cai Z, Guo J, Wang X, Hui Z, Zhang H, Wang J, Wang L. MCPIP1 down-regulates IL-2 expression through an ARE- independent pathway. *PLoS ONE* 2012; 7:e49841.
6. Wang W, Huang X, Xin HB, Fu M, Xue A, Wu ZH. TRAF Family Member-associated NF- $\kappa$ B Activator (TANK) Inhibits Genotoxic Nuclear Factor  $\kappa$ B Activation by Facilitating Deubiquitinase USP10-dependent Deubiquitination of TRAF6 Ligase. *J Biol Chem* 2015; 290:13372-13385.
7. Wang K, Niu J, Kim H, Kolattukudy PE. Osteoclast precursor differentiation by MCPIP via oxidative stress, endoplasmic reticulum stress, and autophagy. *J Mol Cell Biol* 2011; 3(6):360-8.
8. Roy A, Zhang M, Saad Y, Kolattukudy PE. Antidicer RNase activity of monocyte chemotactic protein-induced protein-1 is critical for inducing angiogenesis. *Am J Physiol Cell Physiol* 2013.
9. Lipert B, Wegrzyn P, Sell H, Eckel J, Winiarski M, Budzynski A, Matlok M, Kotlinowski J, Ramage L, Malecki M, Wilk W, Mitus J, Jura J. Monocyte chemoattractant protein-induced protein 1 impairs adipogenesis in 3T3-L1 cells. *Biochim Biophys Acta* 2014; 1843(4):780-8.
10. Losko M, Lichawska-Cieslar A, Kulecka P, Paziewska A, Rumieniczek I, Mikula M, Jura J. Ectopic overexpression of MCPIP1 impairs adipogenesis by modulating microRNAs. *Biochim Biophys Acta Mol Cell Res* 2018; 1865(1):186-195.
11. Losko M, Dolicka D, Pydyn N, Jankowska U, Kedracka-Krok S, Kulecka M, Paziewska A, Mikula M, Major P, Winiarski M, Budzynski A, Jura J. Integrative genomics reveal a role for MCPIP1 in adipogenesis and adipocyte metabolism. *Cell Mol Life Sci* 2019; doi: 10.1007/s00018-019-03434-5.
12. Pydyn N, Kadluczka J, Kus E, Pospiech E, Losko M, Fu M, Jura J, Kotlinowski J. RNase MCPIP1 regulates hepatic peroxisome proliferator-activated receptor gamma via TXNIP/PGC-1alpha pathway. *Biochim Biophys Acta Mol Cell Biol Lipids* 2019; 1864(10):1458-1471.

13. Liang J, Saad Y, Lei T, Wang J, Qi D, Yang Q, Kolattukudy PE, Fu M. MCP-induced protein 1 deubiquitinates TRAF proteins and negatively regulates JNK and NF-kappaB signaling. *J Exp Med* 2010; 207:2959-2973.
14. Yu F, Du F, Wang Y, Huang S, Miao R, Major AS, Murphy EA, Fu M, Fan D. Bone marrow deficiency of MCPIP1 results in severe multi-organ inflammation but diminishes atherogenesis in hyperlipidemic mice. *PLoS One* 2013; 8(11):e80089.
15. Li Z, Han S, Jia Y, Yang Y, Han F, Wu G, Li X, Zhang W, Jia W, He X, Han J, Hu D. MCPIP1 regulates ROR $\alpha$  expression to protect against liver injury induced by lipopolysaccharide via modulation of miR-155. *J Cell Physiol* 2019; 234:16562–16572.
16. Sun P, Lu YX, Cheng D, Zhang K, Zheng J, Liu Y, Wang X, Yuan YF, Tang YD. Monocyte Chemoattractant Protein-Induced Protein 1 Targets Hypoxia-Inducible Factor 1 $\alpha$  to Protect Against Hepatic Ischemia/Reperfusion Injury. *Hepatology* 2018; 68(6):2359-2375.
17. Kleiner DE, Brunt EM, Van Natta M, Behling C, Contos MJ, Cummings OW, Ferrell LD, Liu YC, Torbenson MS, Unalp-Arida A, Yeh M, McCullough AJ, Sanyal AJ, NASH Clinical Research Network. Design and validation of a histological scoring system for nonalcoholic fatty liver disease. *Hepatology* 2005; 41(6):1313-21.
18. Farrell GC, Larter CZ. Nonalcoholic fatty liver disease: from steatosis to cirrhosis. *Hepatology* 2006; 43: 99-112.
19. Streba LA, Vere CC, Rogoveanu I, Streba CT. NAFLD, metabolic risk factors, and hepatocellular carcinoma: an open question. *World J Gastroenterol* 2015; 21(14):4103-10.
20. Li Y, Huang X, Huang S, He H, Lei T, Saaoud F, Yu XQ, Melnick A, Kumar A, Papasian CJ, Fan D, Fu M. Central role of myeloid MCPIP1 in protecting against LPS-induced inflammation and lung injury. *Signal Transduct Target Ther* 2017; 2:17066.
21. Le Floch JP, Escuyer P, Baudin E, Baudon D, Perlemuter L. Blood glucose area under the curve. Methodological aspects. *Diabetes Care* 1990; 13(2):172-5.
22. Nguyen P, Leray V, Diez M, Serisier S, Le Bloc'h J, Siliart B, Dumon H. Liver lipid metabolism. *J Anim Physiol Anim Nutr* 2008; 92(3):272-83.
23. Petinelli P, Videla LA. Up-regulation of PPAR-gamma mRNA expression in the liver of obese patients: an additional reinforcing lipogenic mechanism to SREBP-1c induction. *J Clin Endocrinol Metab* 2011; 96(5):1424-30.
24. Schroeder-Gloeckler JM, Rahman SM, Janssen RC, Qiao L, Shao J, Roper M, Fischer SJ, Lowe E, Orlicky DJ, McManaman JL, Palmer C, Gitomer WL, Huang W, O'Doherty RM, Becker TC, Klemm DJ, Jensen DR, Pulawa LK, Eckel RH, Friedman JE. CCAAT/enhancer-binding protein beta deletion reduces adiposity, hepatic steatosis, and diabetes in *Lepr(db/db)* mice. *J Biol Chem* 2007; 282: 13717-15729.
25. Koyama Y, Brenner DA. Liver inflammation and fibrosis. *J Clin Invest* 2017; 127(1):55-64.

26. Wilson CG, Tran JL, Erion DM, Vera NB, Febbraio M, Weiss EJ. Hepatocyte-specific disruption of CD36 attenuates fatty liver and improves insulin sensitivity in HFD-fed mice. *Endocrinology* 2016; 157(2):570–85.
27. Loomis AK, Kabadi S, Preiss D, Hyde C, Bonato V, St Louis M, Desai J, Gill JMR, Welsh P, Waterworth D, Sattar N. Body mass index and risk of nonalcoholic fatty liver disease: two electronic health record prospective studies. *J Clin Endocrinol Metab* 2016; 101(3):945–52.
28. WHO Obesity. Available from: <https://www.who.int/en/news-room/fact-sheets/detail/obesity-and-overweight>.
29. Moody J, Yang C, Sedinkin J, Chang Y. Systemic MCP1 Deficiency in Mice Impairs Lipid Homeostasis. *Current Research in Pharmacology and Drug Discovery* 2020; 1:1-9.
30. Del Campo JA, Gallego P, Grande L. Role of inflammatory response in liver diseases: Therapeutic strategies. *World J Hepatol* 2018; 10(1):1-7.
31. Seelaender M, Laviano A, Busquets S, Puschel GP, Margaria T, Batista Jr ML. Inflammation in Cachexia. *Mediators Inflamm* 2015; 2015:536954.
32. Petruzzelli M, Wagner EF. Mechanisms of metabolic dysfunction in cancer-associated cachexia. *Genes Dev* 2016; 30(5):489-501.
33. Deans DA, Tan BH, Wigmore SJ, Ross JA, de Beaux AC, Paterson-Brown S, Fearon KC. The influence of systemic inflammation, dietary intake and stage of disease on rate of weight loss in patients with gastro-esophageal cancer. *Br J Cancer* 2009; 100(1):63-9.
34. Goto M, Yoshioka T, Battelino T, Ravindranath T, Zeller WP. TNF $\alpha$  decreases gluconeogenesis in hepatocytes isolated from 10-day-old rats. *Pediatr Res* 2001; 49(4):552-7.
35. Pin F, Barreto R, Couch ME, Bonetto A, O'Connell TM. Cachexia induced by cancer and chemotherapy yield distinct perturbations to energy metabolism. *J Cachexia Sarcopenia Muscle* 2019; 10(1):140-154.
36. Porporato PE. Understanding cachexia as a cancer metabolism syndrome. *Oncogenesis* 2016; 5:e200.
37. Silvério R1, Laviano A, Rossi Fanelli F, Seelaender M. L-Carnitine induces recovery of liver lipid metabolism in cancer cachexia. *Amino Acids* 2012; 42(5):1783-92.
38. Jones A, Freidrich K, Rohm M, Schafer M, Algire C, Kulozik P, Seibert O, Muller-Decker K, Sijmonsma T, Strzoda D, Sticht C, Gretz N, Dallinga-Thie GM, Leuchs B, Kogl M, Stremmel W, Diaz MB, Herzig S. TSC22D4 is a molecular output of hepatic wasting metabolism. *EMBO Mol Med* 2013; 5(2):294-308.
39. Agustsson T, Ryden M, Hoffstedt J, van Harmelen V, Dicker A, Laurencikiene J, Isaksson, Permert J, Arner P. Mechanism of increased lipolysis in cancer cachexia. *Cancer Res* 2007; 67(11):5531-7.
40. Daas SI, Rizeq BR, Nasrallah GK. Adipose tissue dysfunction in cancer cachexia. *J Cell Physiol* 2018; 234(1):13-22.

41. Kliewer KL, Ke JY, Tian M, Cole RM, Andridge RR, Belury MA. Adipose tissue lipolysis and energy metabolism in early cancer cachexia in mice. *Cancer Biol Ther* 2015; 16(6):886-97.
42. Sun R, Zhang S, Lu X, Hu W, Lou N, Zhao Y, Zhou J, Zhang X, Yang H. Comparative molecular analysis of early and late cancer cachexia induced muscle wasting in mouse models. *Oncol Rep* 2016; 36(6):3291-3302.

Table 1: Immune profile of plasma samples from 22 week-old mice determined by Luminex Assay. Out of 45 analytes, 14 has not been detected, namely: IL-2, IL-1 $\beta$ , IL-3, IL-7, CCL4/MIP-1 beta, CCL2/MCP1, RAGE, IL17e/IL25, IL17/IL17a, IL1a, IL-4, IL-33, CCL5/RANTES, FGF-basic. For *Mcip1*<sup>f/f</sup> n=6, for *Mcip1*<sup>LysMKO</sup> n=7, for *Mcip1*<sup>AlbKO</sup> n=7. The table shows means  $\pm$  SEM; \* p<0.05; \*\* p<0.01; \*\*\* p<0.001, nd – not detected.

| Function       | Analyte [pg/mL]   | <i>Mcip1</i> <sup>f/f</sup> | <i>Mcip1</i> <sup>LysMKO</sup> | <i>Mcip1</i> <sup>AlbKO</sup> |
|----------------|-------------------|-----------------------------|--------------------------------|-------------------------------|
| Interleukins   | IL-5              | nd                          | 0.047 $\pm$ 0.013 **           | nd                            |
|                | IL-6              | nd                          | 0.018 $\pm$ 0.006 *            | nd                            |
|                | IL-6 R alpha      | 14.99 $\pm$ 1.06            | 30.12 $\pm$ 2.41 ***           | 14.55 $\pm$ 0.76              |
|                | IL-10             | nd                          | 0.030 $\pm$ 0.007 **           | nd                            |
|                | IL-12 p70         | nd                          | 0.140 $\pm$ 0.065              | nd                            |
|                | IL-13             | nd                          | 0.252 $\pm$ 0.025 ***          | nd                            |
|                | IL-16             | 0.463 $\pm$ 0.104           | 0.561 $\pm$ 0.174              | 0.434 $\pm$ 0.075             |
|                | IL-27             | nd                          | 0.023 $\pm$ 0.008 **           | nd                            |
| Chemokines     | CCL8/MCP-2        | 127.16 $\pm$ 10.59          | 525.62 $\pm$ 60.80***          | 141.83 $\pm$ 11.88            |
|                | CCL7/MARC         | 0.063 $\pm$ 0.015           | 0.204 $\pm$ 0.015 ***          | 0.060 $\pm$ 0.019             |
|                | CCL12/MCP-5       | 0.027 $\pm$ 0.011           | 0.280 $\pm$ 0.037***           | 0.046 $\pm$ 0.010             |
|                | CCL3/MIP-1 alpha  | 0.970 $\pm$ 0.055           | 3.837 $\pm$ 1.172 *            | 0.890 $\pm$ 0.051             |
|                | CCL20/MIP-3 alpha | 0.126 $\pm$ 0.040           | 0.097 $\pm$ 0.048              | 0.028 $\pm$ 0.028             |
|                | CCL19/MIP-3 beta  | 0.006 $\pm$ 0.004           | 0.040 $\pm$ 0.008 ***          | 0.0003 $\pm$ 0.0002           |
|                | CCL11/Eotaxin     | 1.44 $\pm$ 0.08             | 1.52 $\pm$ 0.15                | 1.34 $\pm$ 0.08               |
|                | CXCL16            | 0.358 $\pm$ 0.027           | 0.203 $\pm$ 0.045              | 0.267 $\pm$ 0.053             |
| Growth factors | GM-CSF            | 0.0005 $\pm$ 0.0002         | 0.0009 $\pm$ 0.0004            | 0.0004 $\pm$ 0.0001           |
|                | M-CSF             | 4.84 $\pm$ 1.03             | 2.55 $\pm$ 0.48                | 6.73 $\pm$ 1.68               |
|                | G-CSF             | 0.125 $\pm$ 0.032           | 0.059 $\pm$ 0.014              | 0.097 $\pm$ 0.021             |
| TNF            | TNF-alpha         | 2.94 $\pm$ 0.03             | 4.13 $\pm$ 0.23 ***            | 2.97 $\pm$ 0.09               |
|                | TNF RI            | 0.753 $\pm$ 0.054           | 1.160 $\pm$ 0.120 **           | 0.759 $\pm$ 0.046             |
|                | TNF RII           | 3.04 $\pm$ 0.20             | 8.63 $\pm$ 1.03 ***            | 3.48 $\pm$ 0.49               |
| Angio-genesis  | VEGF              | nd                          | 0.0030 $\pm$ 0.0006 **         | nd                            |
|                | VEGF R2           | 49.70 $\pm$ 2.11            | 29.77 $\pm$ 2.13 ***           | 48.09 $\pm$ 0.68              |
|                | Endoglin          | 1.88 $\pm$ 0.30             | 1.00 $\pm$ 0.14 *              | 2.27 $\pm$ 0.23               |
| Others         | Trombospondin-4   | 705.99 $\pm$ 99.09          | 380.89 $\pm$ 46.32 *           | 556.98 $\pm$ 31.23            |
|                | CHI3-L1           | 29.40 $\pm$ 3.70            | 145.56 $\pm$ 21.41***          | 42.59 $\pm$ 9.01              |
|                | Icam-1            | 18.06 $\pm$ 2.37            | 13.69 $\pm$ 2.36               | 17.88 $\pm$ 0.75              |
|                | p-Selectin/CD-62P | 29.01 $\pm$ 4.49            | 46.23 $\pm$ 8.13               | 29.09 $\pm$ 4.93              |
|                | Syndecan-1/CD138  | 4.58 $\pm$ 0.74             | 17.51 $\pm$ 5.14 **            | 7.13 $\pm$ 0.69               |
|                | IFN gamma         | 0.03100 $\pm$ 0.00007       | 0.0320 $\pm$ 0.0002            | 0.03100 $\pm$ 0.00009         |

**Figure 1: Mcpip1<sup>LysMKO</sup> mice are characterized by reduced body weight, dyslipidemia and hypoglycemia.**

Control Mcpip1<sup>fl/fl</sup>, Mcpip1<sup>LysMKO</sup> and Mcpip1<sup>AlbKO</sup> mice were analyzed at the age of 10 and 22 weeks (A). (B) Body weight measurements of Mcpip1<sup>fl/fl</sup>, Mcpip1<sup>LysMKO</sup> and Mcpip1<sup>AlbKO</sup> mice fed chow diet. Plasma analysis of 22-week old mice: (C) total cholesterol; (D) HDL; (E) LDL; (F) Triglycerides; (G) ALT; (H) AST and (I) LDH levels. Glucose metabolism was tested after intraperitoneal injection of 2g/kg of glucose by (J) GTT and by (K) calculations of the area under the curve (AUC). For Mcpip1<sup>fl/fl</sup> n=10 (Fig. 1B-I) and n=8 (Fig. 1J,K), for Mcpip1<sup>LysMKO</sup> n=6 (Fig. 1B-I) and n=5 (Fig. 1J,K), for Mcpip1<sup>AlbKO</sup> n=8 (Fig. 1J,K) and n=6 (Fig. 1J,K). The graphs show means ± SEM; \* p<0.05; \*\* p<0.01; \*\*\* p<0.001.

**Figure 2: Expression of Mcpip1 is essential for proper liver metabolism.**

Expression of genes coding for proteins involved in (A) glucose metabolism; (B) lipid transport; (C) oxidation of fatty acids; (D) lipogenesis; (E) inflammation and (F) fibrosis. For Mcpip1<sup>fl/fl</sup> n=8, for Mcpip1<sup>LysMKO</sup> n=6, for Mcpip1<sup>AlbKO</sup> n=9. The graphs show means ± SEM; \* p<0.05; \*\* p<0.01; \*\*\* p<0.001.

**Figure 3: Mcpip1<sup>LysMKO</sup> mice do not develop obesity and hepatic steatosis upon feeding with high fat diet.**

(A) Body weight measurements of Mcpip1<sup>fl/fl</sup>, Mcpip1<sup>LysMKO</sup> and Mcpip1<sup>AlbKO</sup> mice fed high fat diet for 12 weeks. (B) Representative liver hematoxylin & eosin (H&E) and Oil Red O stainings; (C) Quantitative analysis of Oil Red O-stained liver tissues; Plasma analysis of 22-week old mice: (D) Total cholesterol; (E) HDL; (F) LDL; (G) Triglycerides; (H) ALT; (I) AST and (J) LDH levels. Glucose metabolism was tested after intraperitoneal injection of 2g/kg of glucose by (K) GTT and by (L) calculations of the AUC. For Mcpip1<sup>fl/fl</sup> n=7, for Mcpip1<sup>LysMKO</sup> n=6, for Mcpip1<sup>AlbKO</sup> n=6. The graphs show means ± SEM; \* p<0.05; \*\* p<0.01; \*\*\* p<0.001.

**Figure 4: Disturbed hepatic gene expression profile is linked to lean phenotype of HFD-fed Mcpip1<sup>LysMKO</sup> mice.**

Expression of genes coding for proteins involved in (A) glucose metabolism; (B) lipid transport (C) oxidation of fatty acids; (D) lipogenesis; (E) inflammation and (F) fibrosis. All results were calculated in comparison to appropriate gene in Mcpip1<sup>fl/fl</sup> mice fed chow diet ( $\Delta\Delta\text{Ct}$  method). Dotted lines represent results obtained from Mcpip1<sup>fl/fl</sup> mice fed chow diet. For Mcpip1<sup>fl/fl</sup> n=7, for Mcpip1<sup>LysMKO</sup> n=8, for Mcpip1<sup>AlbKO</sup> n=9. The graphs show means ± SEM; \* p<0.05; \*\* p<0.01; \*\*\* p<0.001.

**Figure 5: Myeloid Mcpip1 deletion impairs locomotor activity and causes hypothermia.**

Locomotor activity was measured at both time points by changes in (A) average velocity and (B) total distance traveled. (C) Body weight; and (D) body temperature. For Mcpip1<sup>fl/fl</sup> n=10, for Mcpip1<sup>LysMKO</sup> n=5, for Mcpip1<sup>AlbKO</sup> n=6. The graphs show means ± SEM; \* p<0.05; \*\* p<0.01; \*\*\* p<0.001.

□ Mcpip1<sup>fl/fl</sup>    ■ Mcpip1<sup>LysMKO</sup>    ■ Mcpip1<sup>AlbKO</sup>

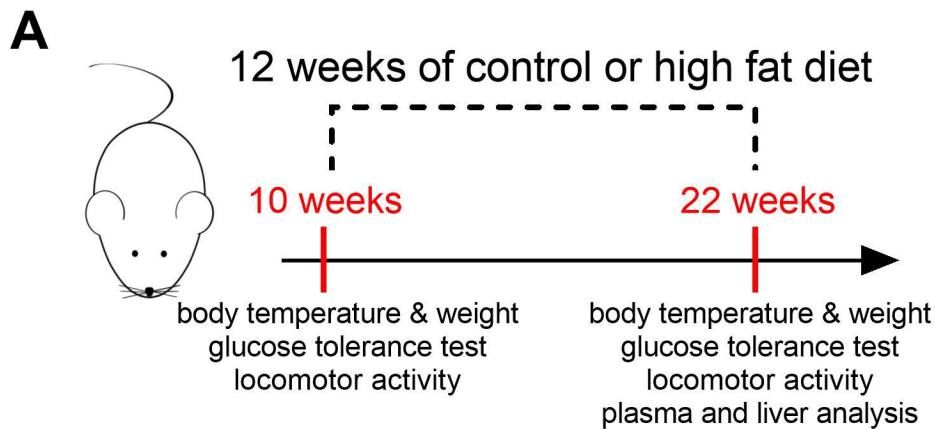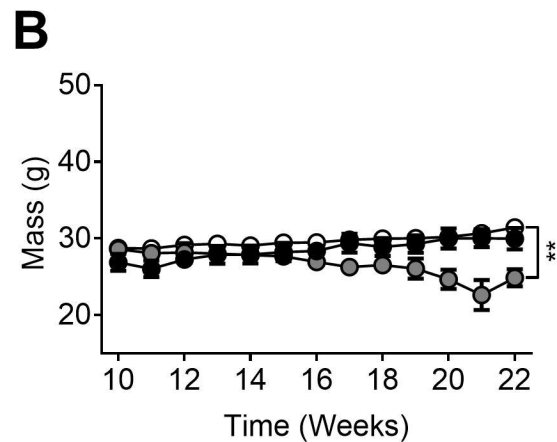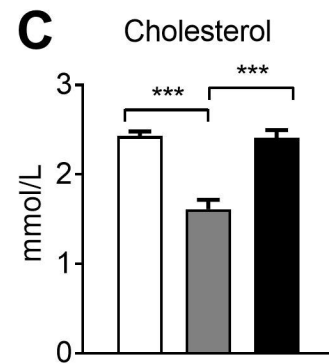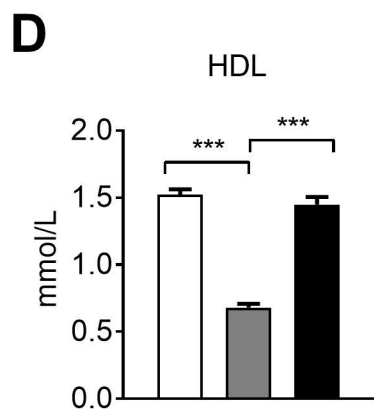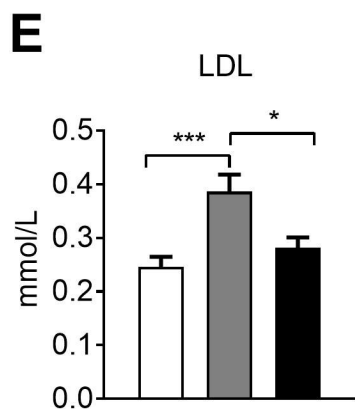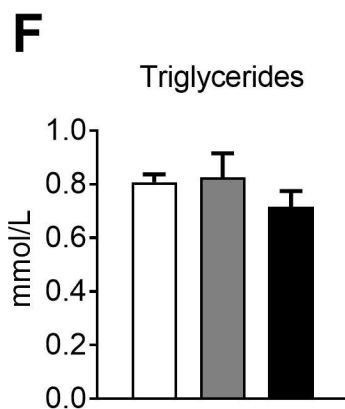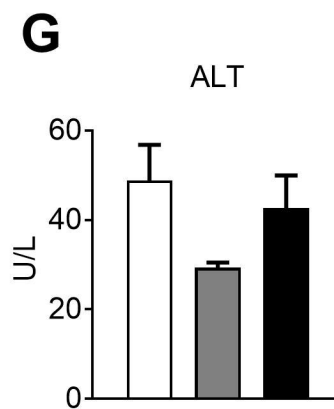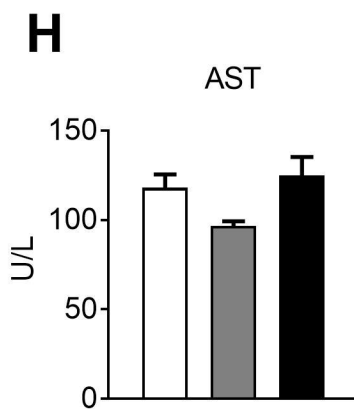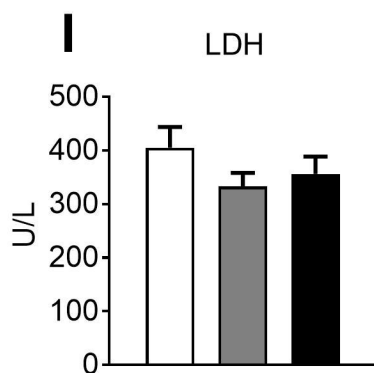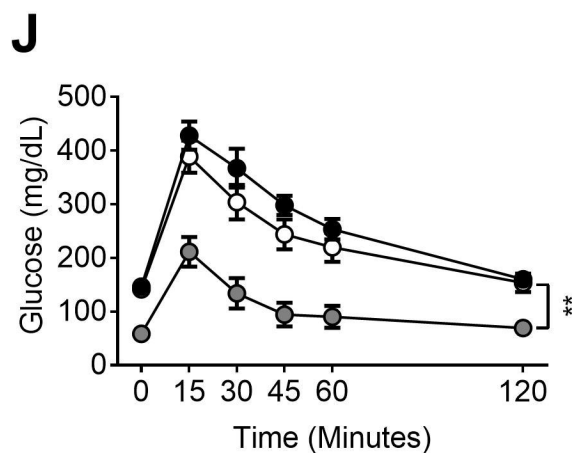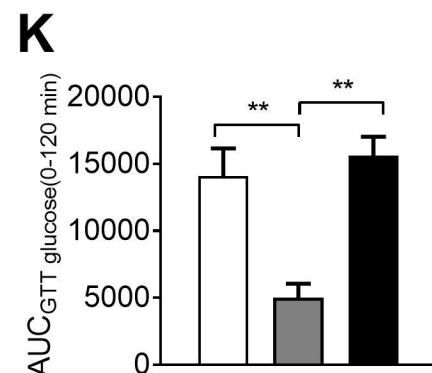

□ *Mcpip1*<sup>fl/fl</sup>    ■ *Mcpip1*<sup>LysMKO</sup>    ■ *Mcpip1*<sup>AlbKO</sup>

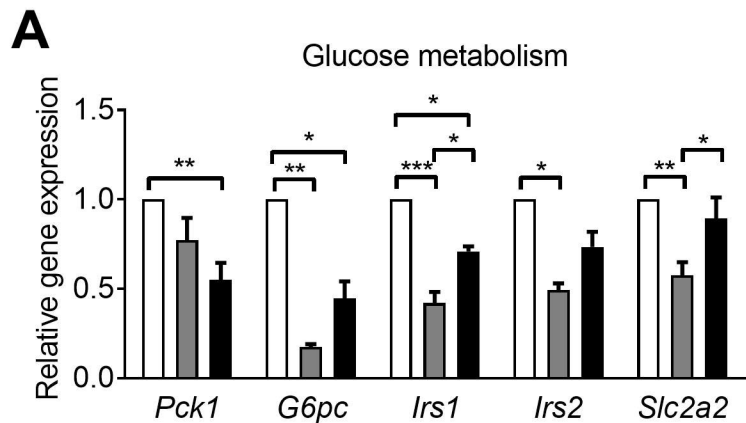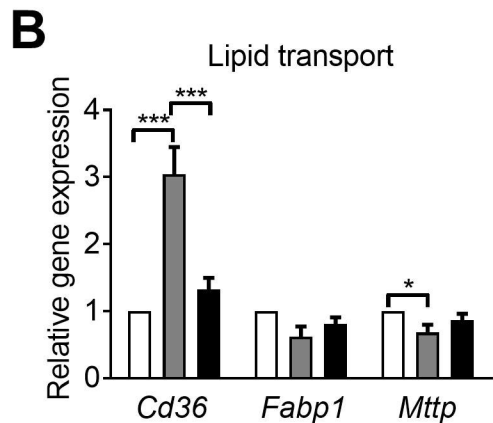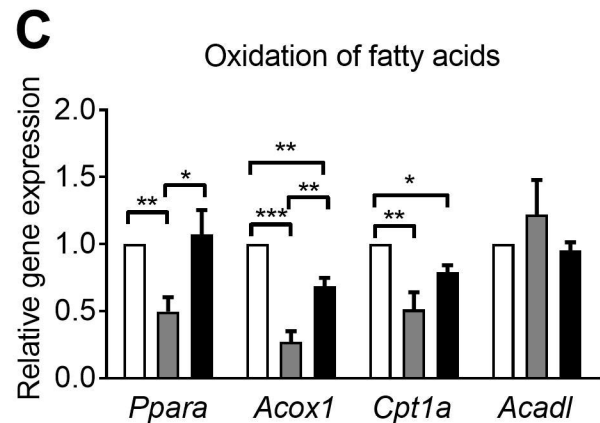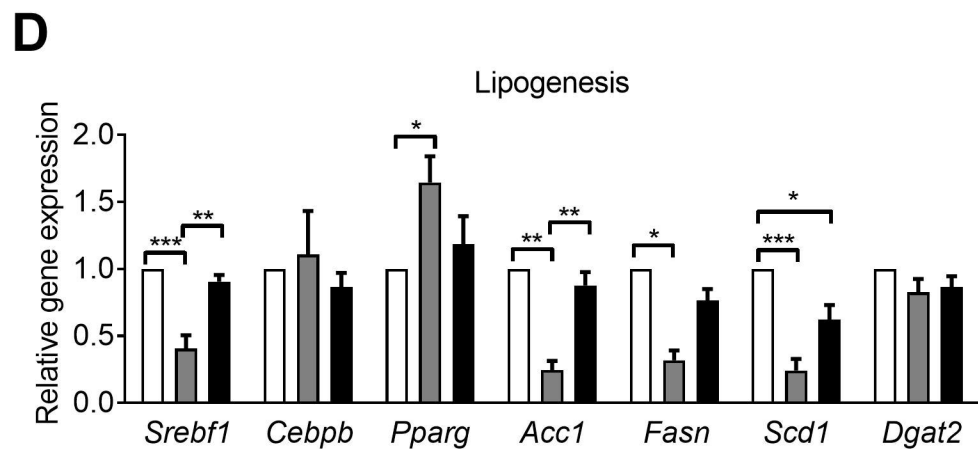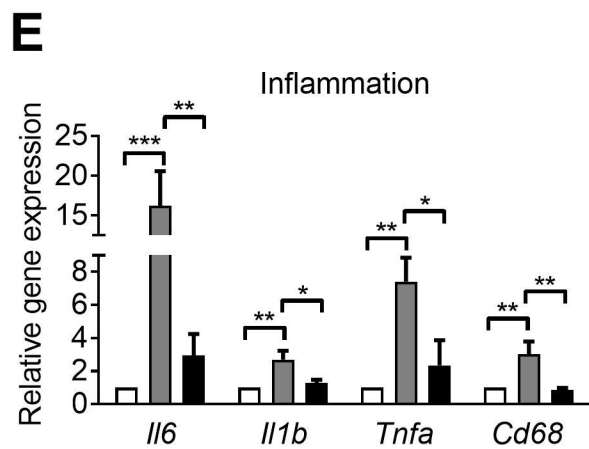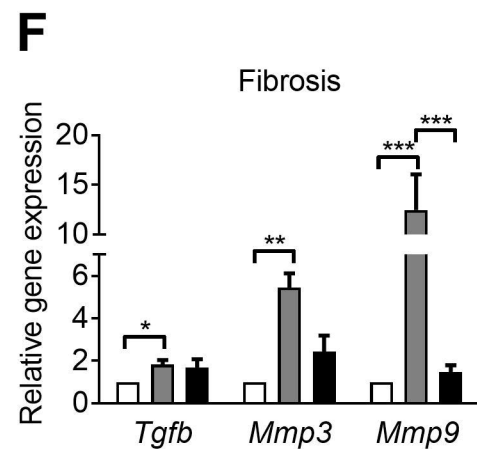

□  $Mcpip1^{fl/fl}$     ■  $Mcpip1^{LysMKO}$     ■  $Mcpip1^{AlbKO}$

**A**

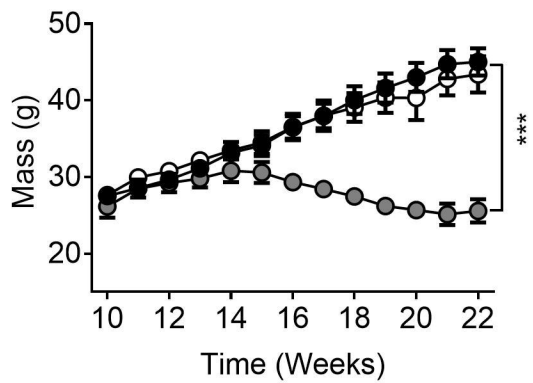

**B**

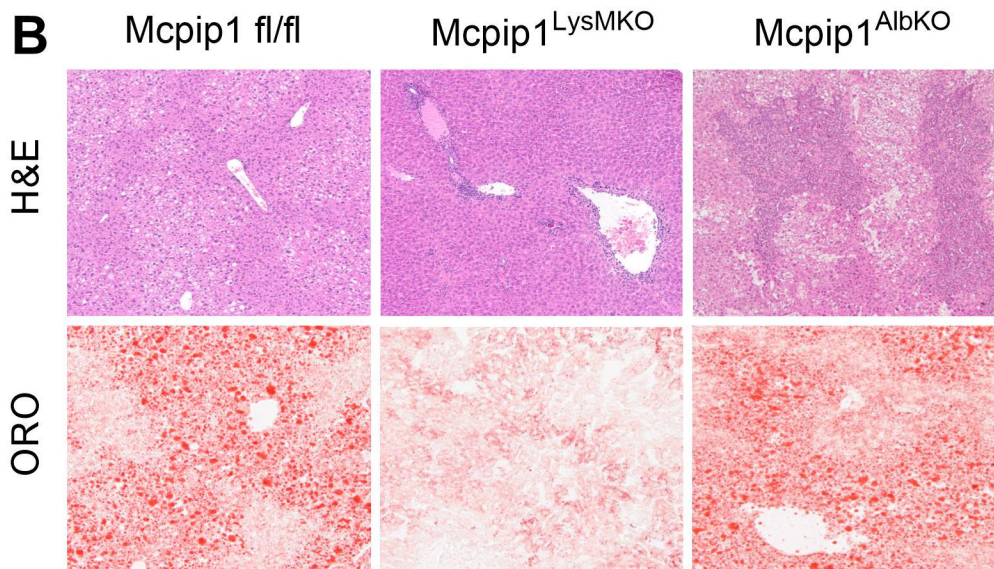

**C**

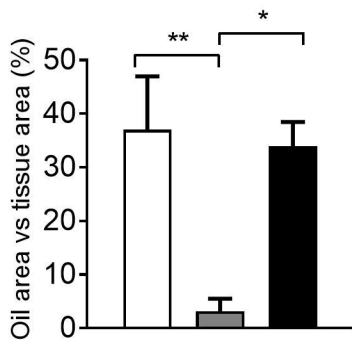

**D**

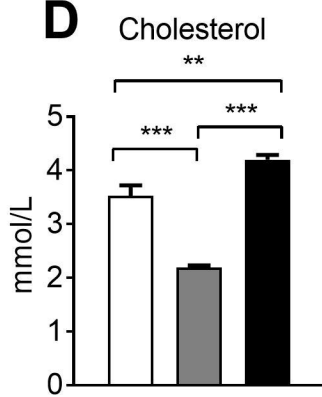

**E**

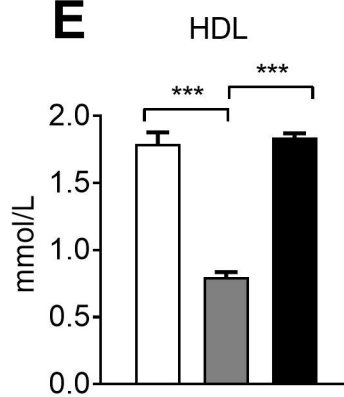

**F**

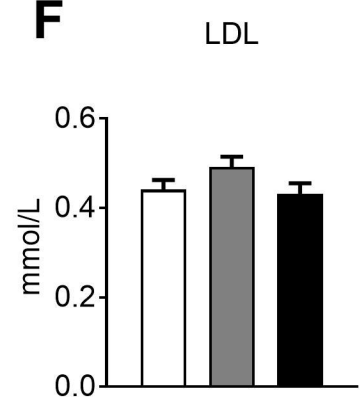

**G**

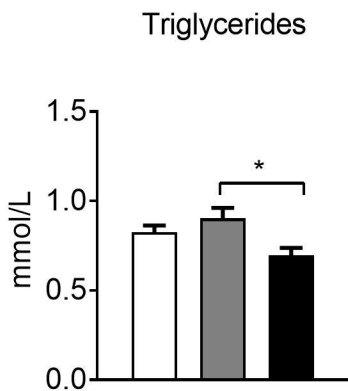

**H**

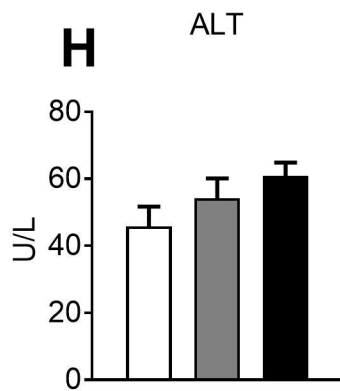

**I**

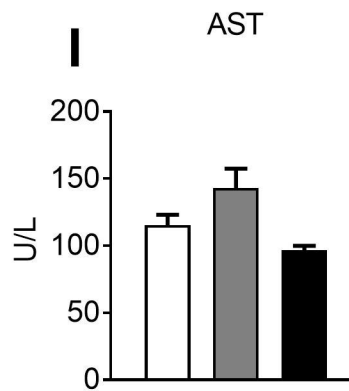

**J**

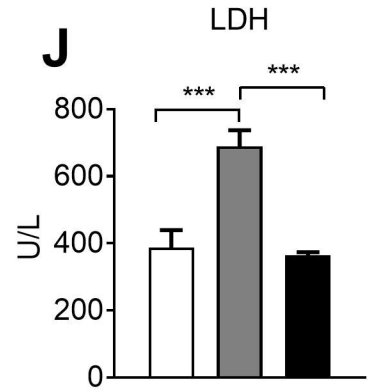

**K**

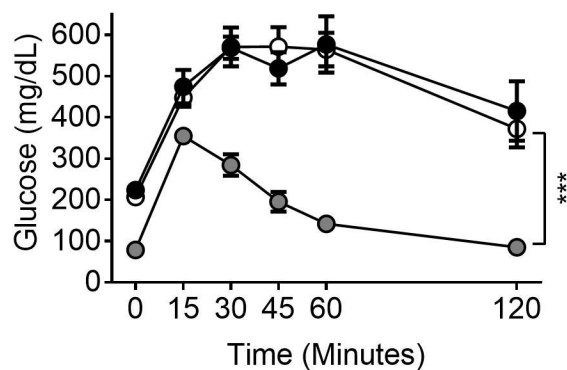

**L**

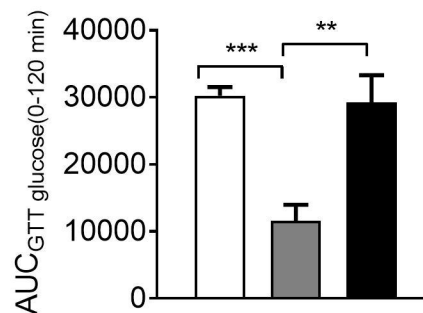



□ *Mcpip1*<sup>fl/fl</sup>    ■ *Mcpip1*<sup>LysMKO</sup>    ■ *Mcpip1*<sup>AlbKO</sup>

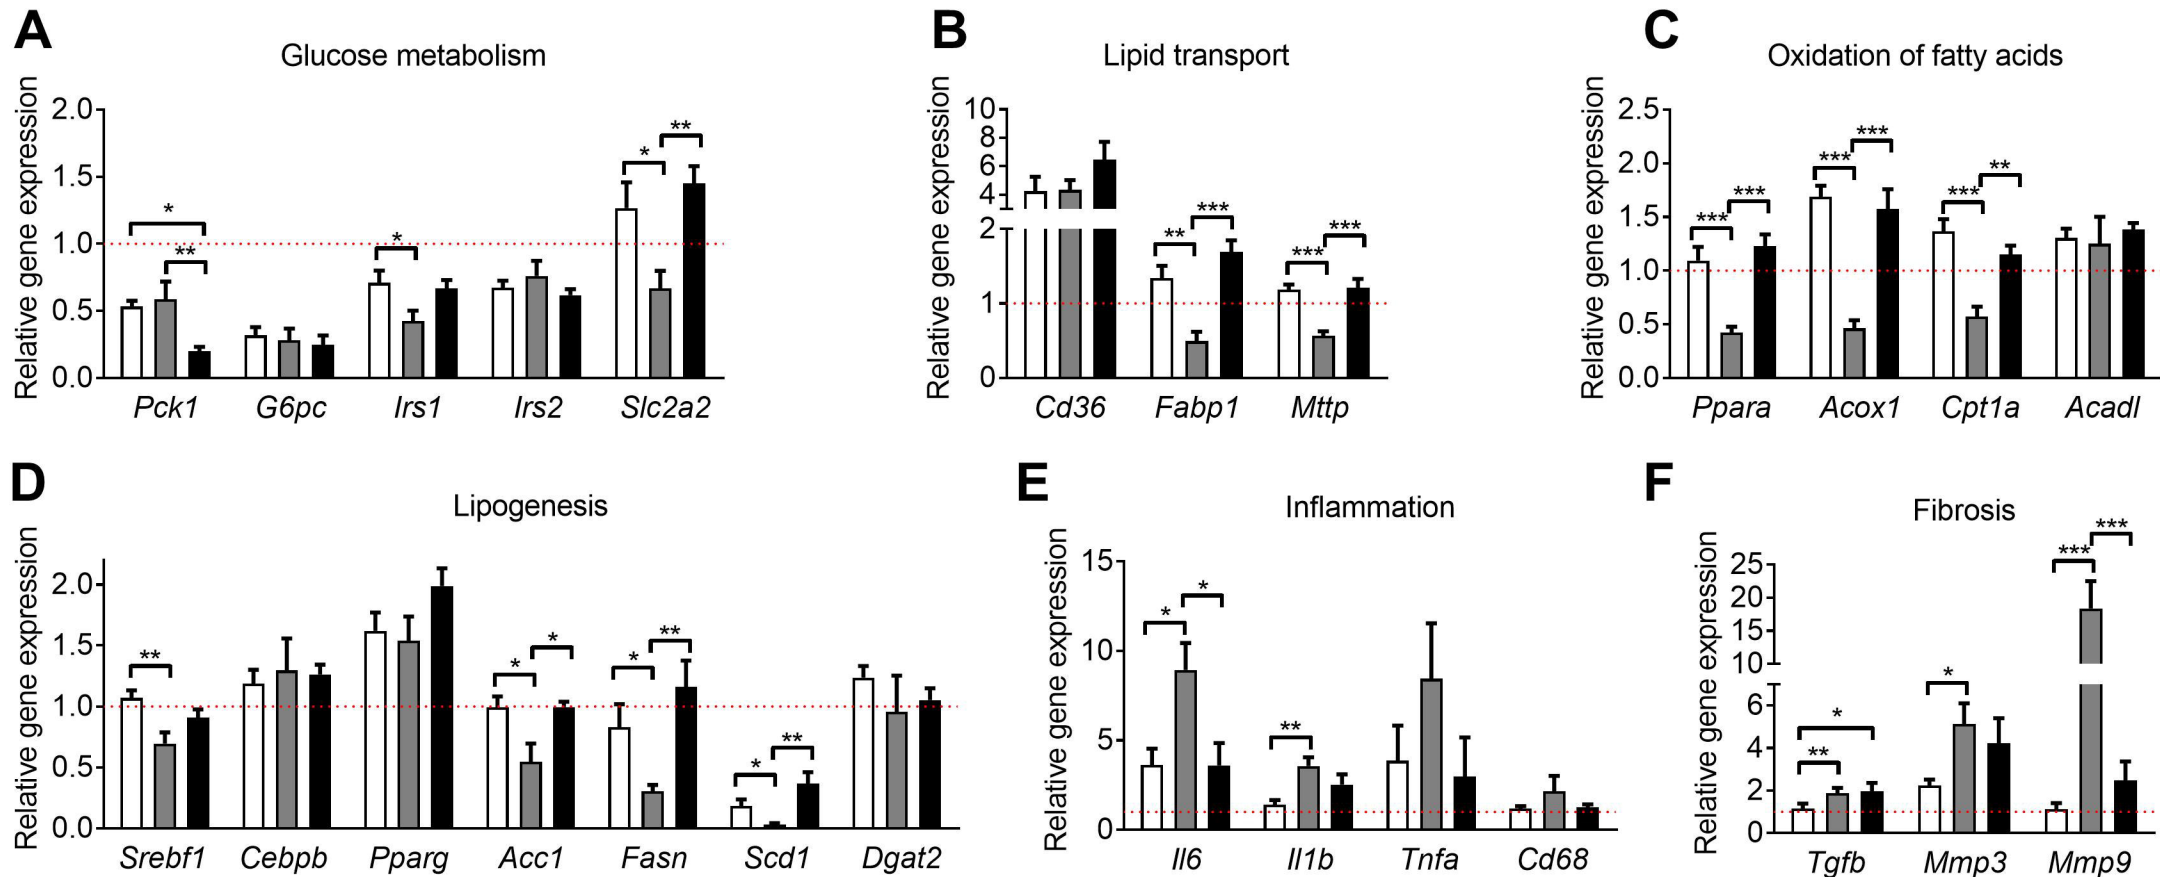

□ *Mcpip1*<sup>fl/fl</sup>    ■ *Mcpip1*<sup>LysMKO</sup>    ■ *Mcpip1*<sup>AlbKO</sup>

**A**

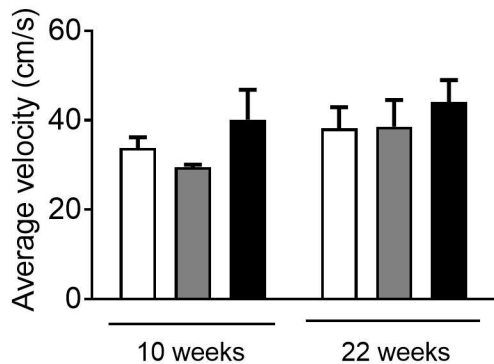

**B**

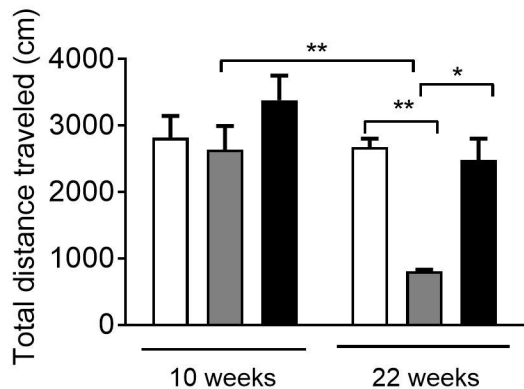

**C**

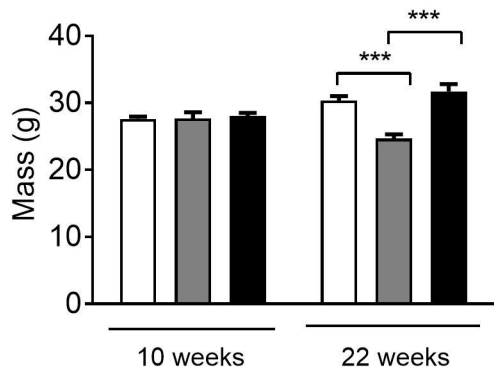

**D**

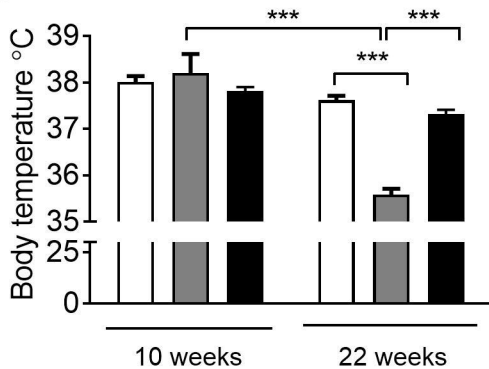

Source: http://biorxiv.org/content/10.1101/2020.09.17.301531v1.full.pdf
